# Supplementary material for: Resveratrol Analogues as Dual Inhibitors of Monoamine Oxidase B and Carbonic Anhydrase VII: A New Multi-Target Combination for Neurodegenerative Diseases?
Source: MDPI journal article supplement (doi:10.3390/molecules27227816), 2022-11-13
Supplement: s1 [file s1]

# Resveratrol Analogues as Dual Inhibitors of Monoamine Oxidase B and Carbonic Anhydrase VII: A New Multi-Target Combination for Neurodegenerative Diseases?

Simone Carradori <sup>1</sup>, Marialuigia Fantacuzzi <sup>1</sup>, Alessandra Ammazzalorso <sup>1</sup>, Andrea Angeli <sup>2</sup>, Barbara De Filippis <sup>1,\*</sup>, Salvatore Galati <sup>3</sup>, Anél Petzer <sup>4</sup>, Jacobus P. Petzer <sup>4</sup>, Giulio Poli <sup>3</sup>, Tiziano Tuccinardi <sup>3</sup>, Mariangela Agamennone <sup>1</sup> and Claudiu T. Supuran <sup>2</sup>

<sup>1</sup> Department of Pharmacy, University “G. d’Annunzio” University of Chieti-Pescara, via dei Vestini 31, 66100 Chieti, Italy

<sup>2</sup> Neurofarba Department, University of Florence, 50019 Sesto Fiorentino, Italy

<sup>3</sup> Department of Pharmacy, University of Pisa, Via Bonanno 6, 56126 Pisa, Italy

<sup>4</sup> Pharmaceutical Chemistry and Centre of Excellence for Pharmaceutical Sciences, North-West University, Potchefstroom 2520, South Africa

\* Correspondence: barbara.defilippis@unich.it; Tel.: +39-087-1355-4685

**Figure S1.** The catalytic site of MAO-B in complex with safinamide.

**Figure S2.** The catalytic site of MAO-B in complex with and RSV.

**Figure S3.** The catalytic site of MAO-A in complex with harmine.

**Figure S4.** The catalytic site of MAO-A in complex with RSV.

**Figure S5.** Minimized average structure of hCA VII (PBD code: 3MDZ) in complex with compound 4 superimposed to hCA I X-ray structure (PDB code: 1AZM).

**Figure S6.** Minimized average structure of hCA VII (PBD code: 3MDZ) in complex with compound 4 superimposed to hCA VA homology model.

**Figure S7.** Minimized average structure of hCA VII (PBD code: 3MDZ) in complex with compound 4 superimposed to hCA VB homology model.

**Table S1.** Linear Interaction Energy results for the four analysed ligand-protein complexes of compound 4.

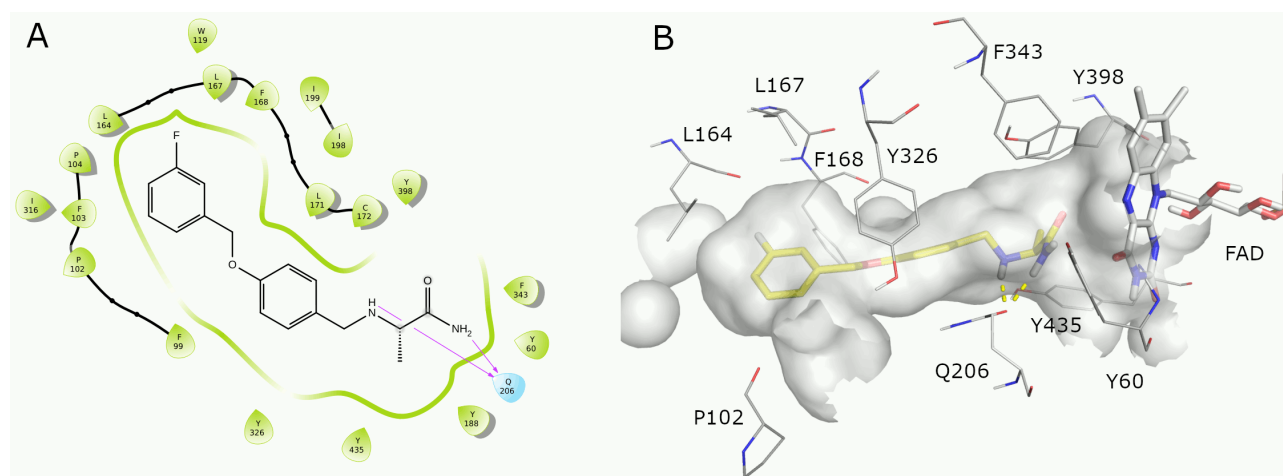

**Figure S1.** The catalytic site of MAO-B in complex with safinamide. (A) 2D ligand interaction diagram; (B) best docked pose of safinamide (yellow sticks) with MAO-B surrounding residues (grey lines). The crystallographic ligand of MAO-B, safinamide, mediates hydrophobic interactions in the hydrophobic cavity, in particular with F103, L164, L167, L171, I199, F343, Y398 and FAD, and 2 H-bonds with the side chain of Gln206. The docking score of safinamide is -10.375 kcal/mol.

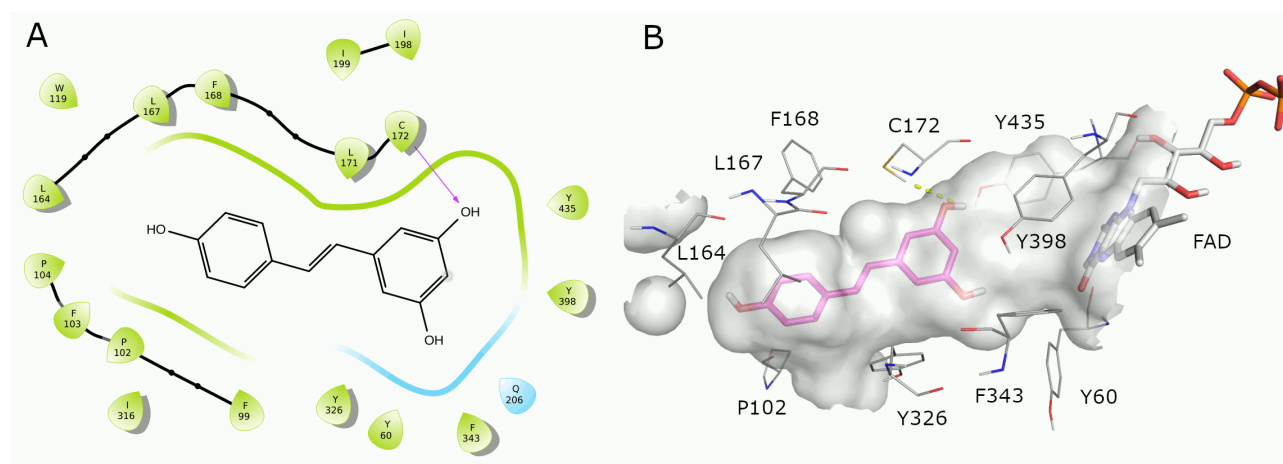

**Figure S2.** The catalytic site of MAO-B in complex with RSV. (A) 2D ligand interaction diagram; (B) best docked pose of RSV (magenta sticks) with MAO-B surrounding residues (grey lines). The analysis of the docked poses of RSV shows that the ligand stilbene scaffold is located in the hydrophobic region of MAO-B. The hydroxyl in 5 position makes an H-bond with C172. At the same time, the OH groups in 3 and 4' occupy the hydrophobic region determining an unfavourable contribution to the docking score and probably, explaining the limited activity of this compound as MAO inhibitor.

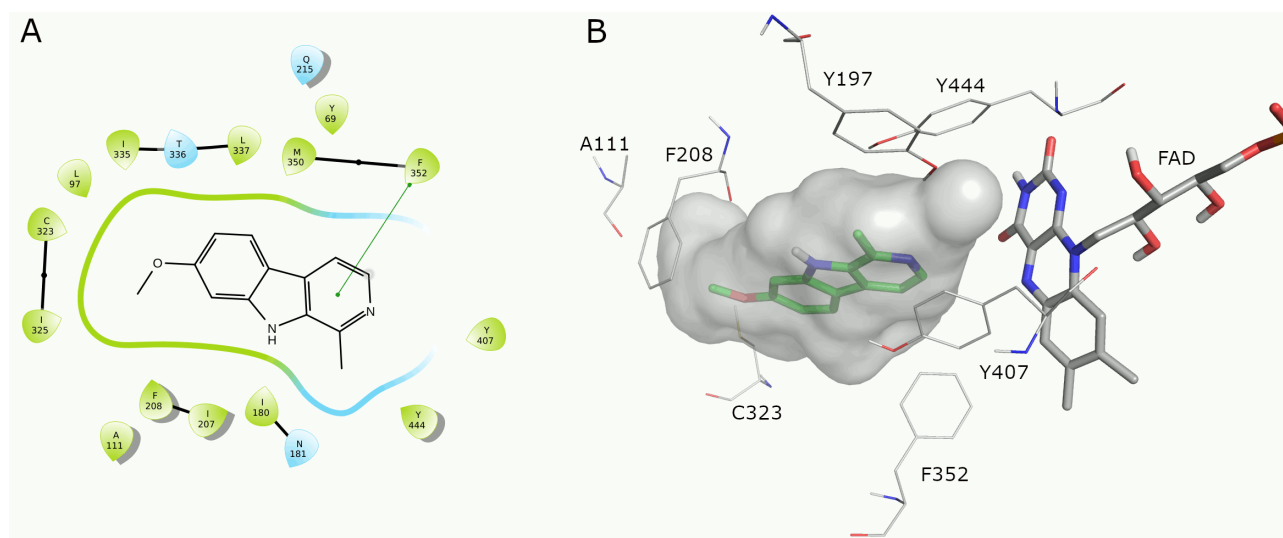

**Figure S3.** The catalytic site of MAO-A in complex with harmine. (A) 2D ligand interaction diagram; (B) best docked pose of harmine (green sticks) with MAO-A surrounding residues (grey lines). Harmine, the crystallographic ligand of MAO-A, occupies the hydrophobic region and makes  $\pi$ - $\pi$  interaction with Phe352 (Figure S2 A,B). The analysis of RSV in MAO-A revealed that the three hydroxyls are external to the hydrophobic region, and there is a  $\pi$ - $\pi$  interaction with Phe208, that contributes to better positioning of RSV in MAO-A with respect to MAO-B, in accordance with the biological data (Figure S2 C,D).

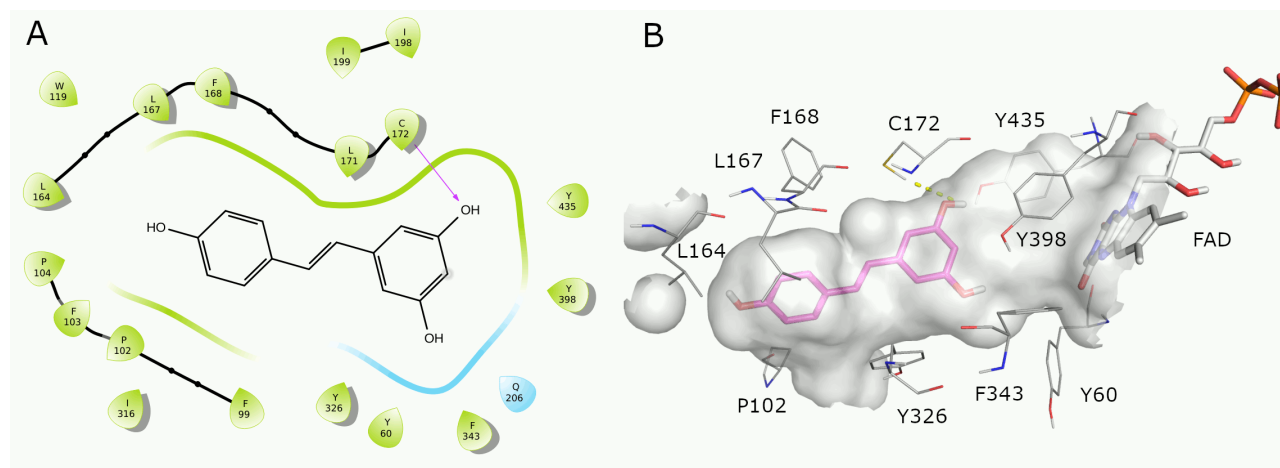

**Figure S4.** The catalytic site of MAO-A in complex with RSV. (A) 2D ligand interaction diagram; (B) best docked pose of RSV (magenta sticks) with MAO-A surrounding residues (grey lines). The analysis of RSV in MAO-A revealed that the three hydroxyls are external to the hydrophobic region, and there is a  $\pi$ - $\pi$  interaction with F208, that contributes to better positioning of RSV in MAO-A with respect to MAO-B, in accordance with the biological data.

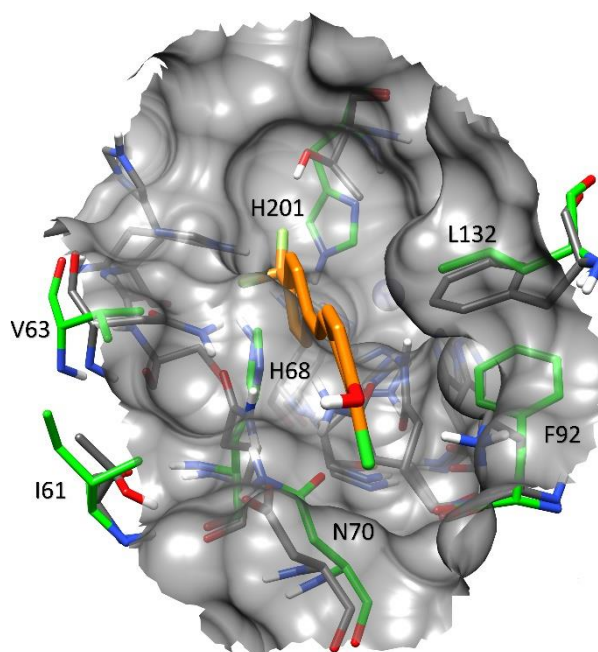

**Figure S5.** Minimized average structure of hCA VII (PBD code: 3MDZ) in complex with compound 4 superimposed to hCA I X-ray structure (PDB code 1AZM). hCA I non-conserved residues are labelled and shown in green. The other residues of hCA I and hCA VII are shown in grey. The protein surface is shown in dark grey.

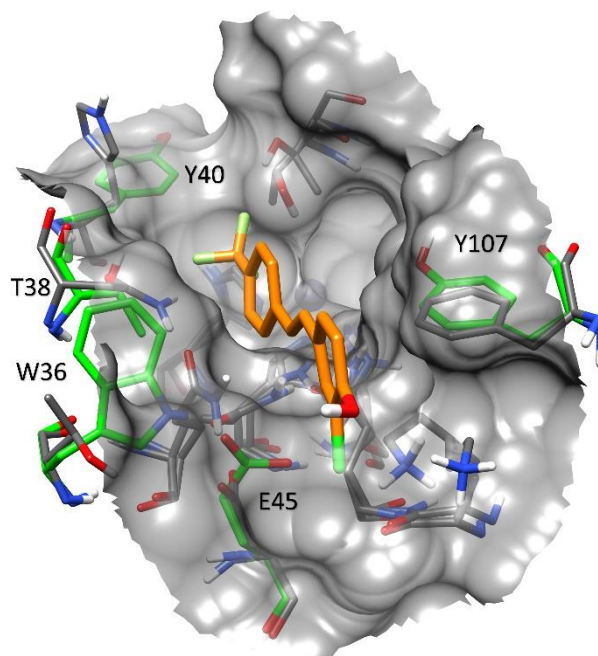

**Figure S6.** Minimized average structure of hCA VII (PBD code: 3MDZ) in complex with compound 4 superimposed to hCA VA homology model. hCA VA non-conserved residues are labelled and shown in green. The other residues of hCA VA and hCA VII are shown in grey. The protein surface is shown in dark grey.

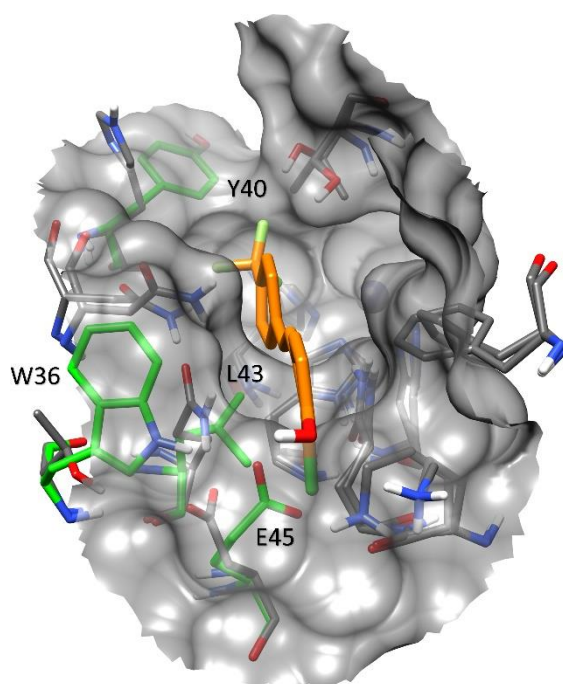

**Figure S7.** Minimized average structure of hCA VII (PBD code: 3MDZ) in complex with compound **4** superimposed to hCA VB homology model. hCA VB non-conserved residues are labelled and shown in green. The other residues of hCA VB and hCA VII are shown in grey. The protein surface is shown in dark grey.

**Table S1.** Linear Interaction Energy (aLIE) results for the four analyzed ligand-protein complexes of compound **4**. Electrostatic (EELE) and van der Waals (EVDW) contributes are also reported. Data are expressed as kcal/mol.

| Complex | EELE | EVDW  | aLIE  |
|---------|------|-------|-------|
| hCA II  | -0.8 | -24.3 | -25.1 |
| hCA IX  | -2.3 | -25.0 | -27.3 |
| hCA VII | -7.5 | -25.5 | -33.0 |
| hCA XII | -5.7 | -24.4 | -30.1 |
